# Supplementary material for: Identification of lysosomotropism using explainable machine learning and morphological profiling cell painting data
Source: Royal Society of Chemistry journal article supplement (doi:10.1039/d4md00107a), 2024-01-01
Supplement: d4md00107a1.pdf [file d4md00107a1.pdf]

Supplementary Information:  
Identification of Lysosomotropism using Explainable Machine  
Learning and Morphological Profiling Cell Painting Data

Aishvarya Tandon, Anna Santura, Herbert Waldmann\*,  
Axel Pahl\*, Paul Czodrowski\*

2023

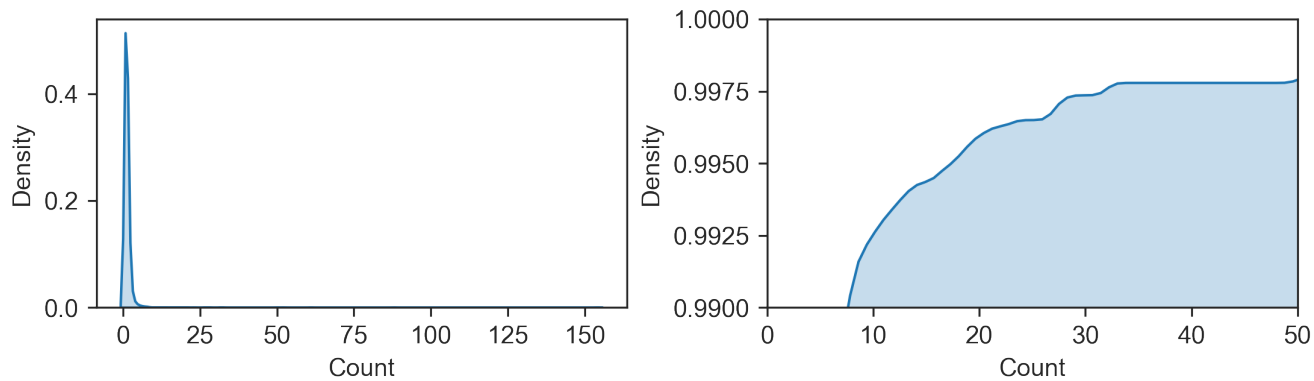

**Figure S1:** MPA: (Cumulative) Density distribution of counts (number of occurrence) of transformations.

## Top 10 Descriptors in the Training Dataset

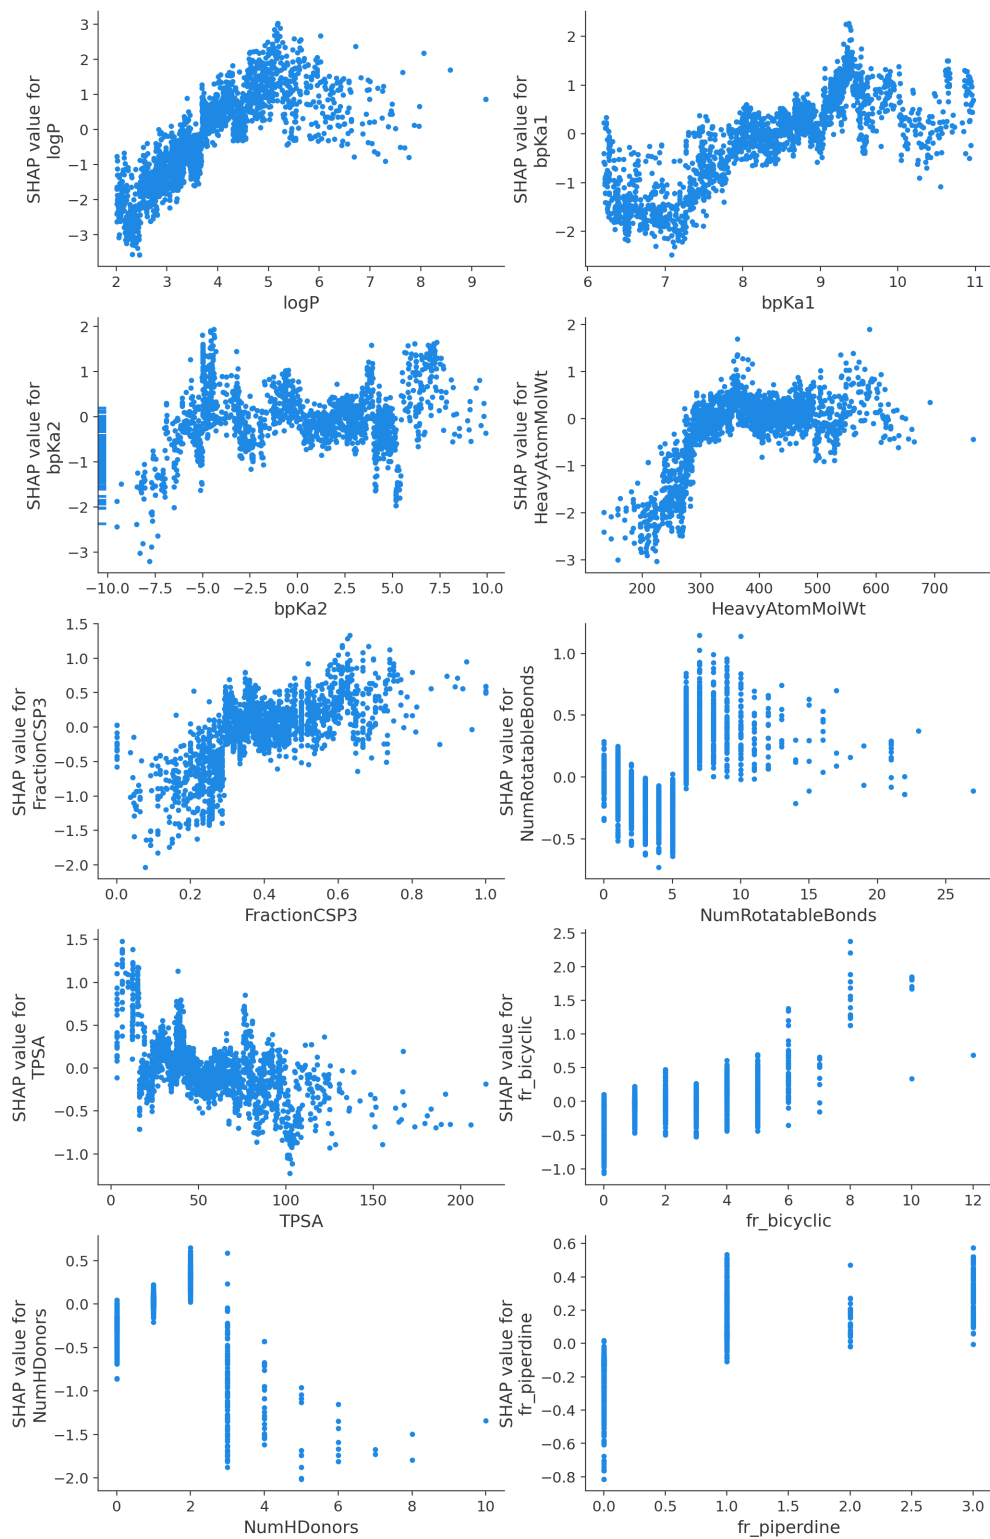

**Figure S2:** Descriptor model: Top 10 descriptors' Dependence Plots in the training dataset.

### Top 10 Descriptors in the 2023 Dataset

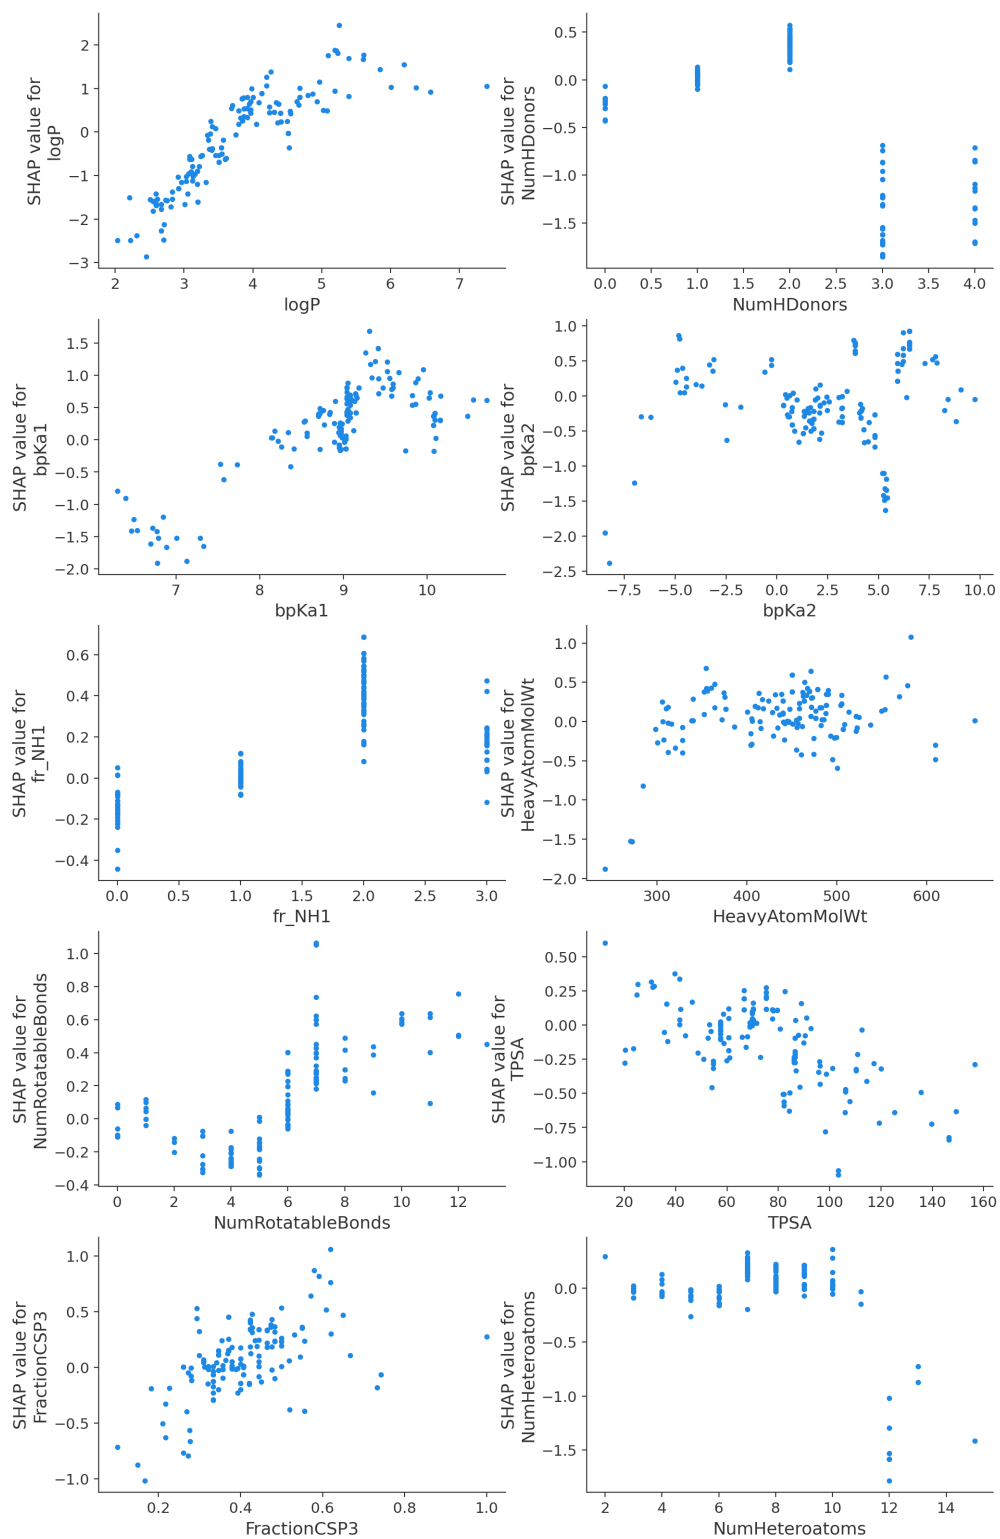

**Figure S3:** Descriptor model: Top 10 descriptors' Dependence Plots in the time-split dataset.

### Top 10 Descriptors in the External Dataset

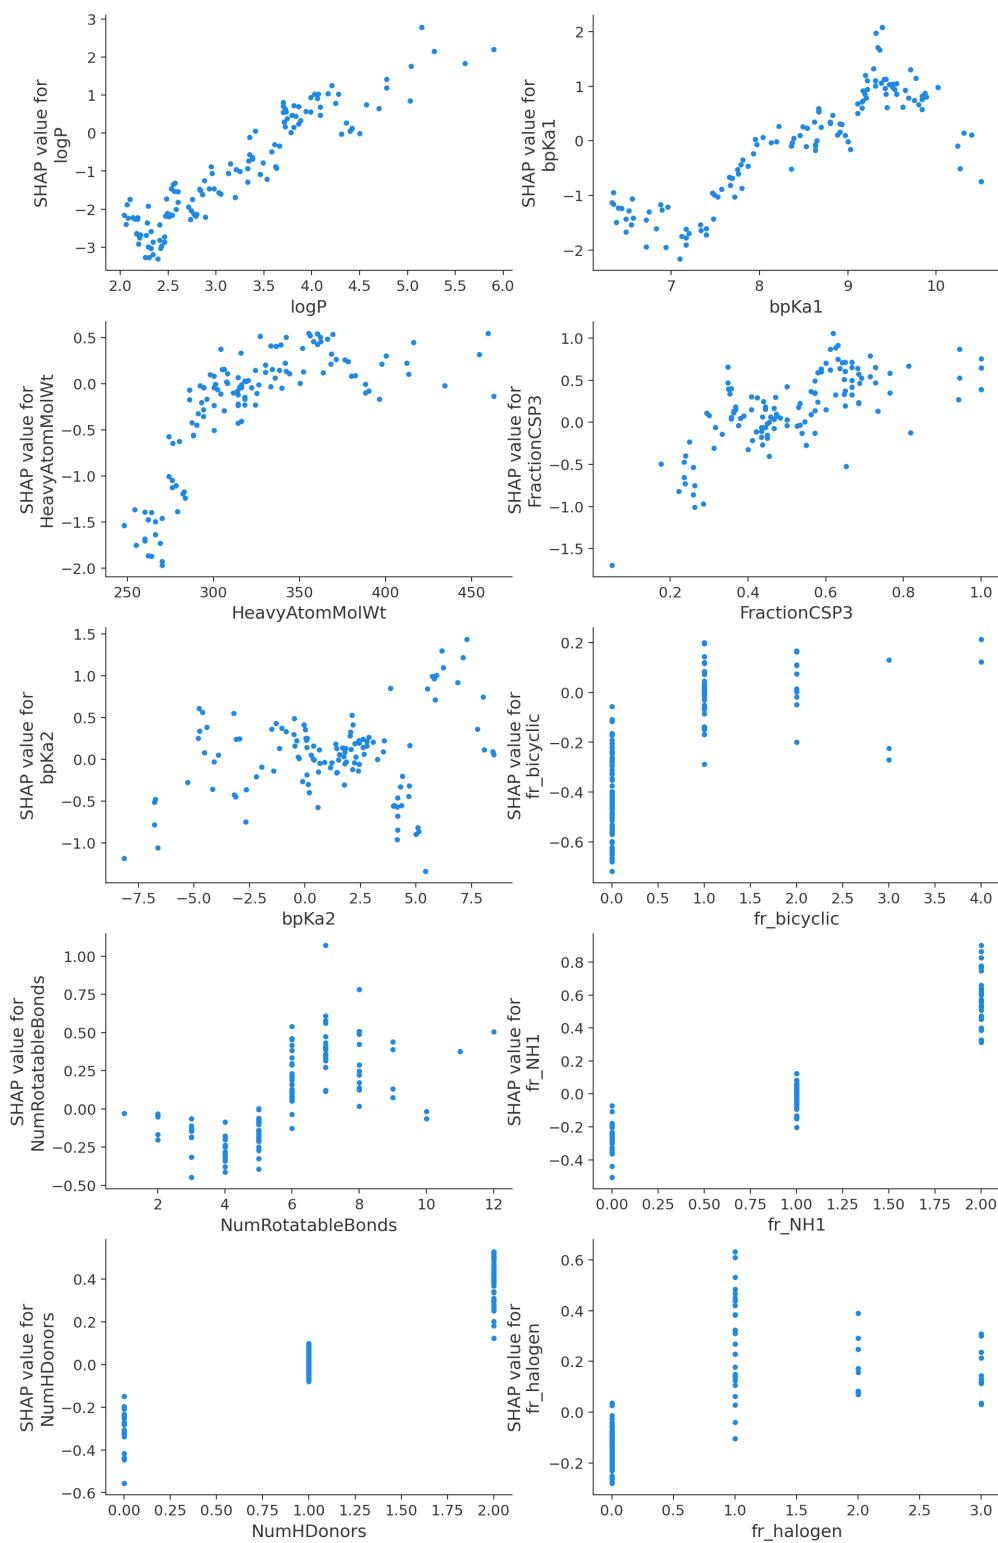

**Figure S4:** Descriptor model: Top 10 descriptors' Dependence Plots in the external dataset.

**Figure S5:** Fingerprint model: X-FP report for the Training Set

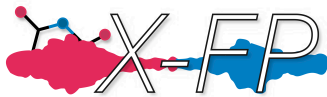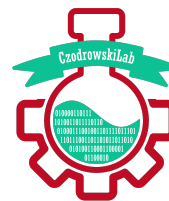

## Training Data: X-FP Report

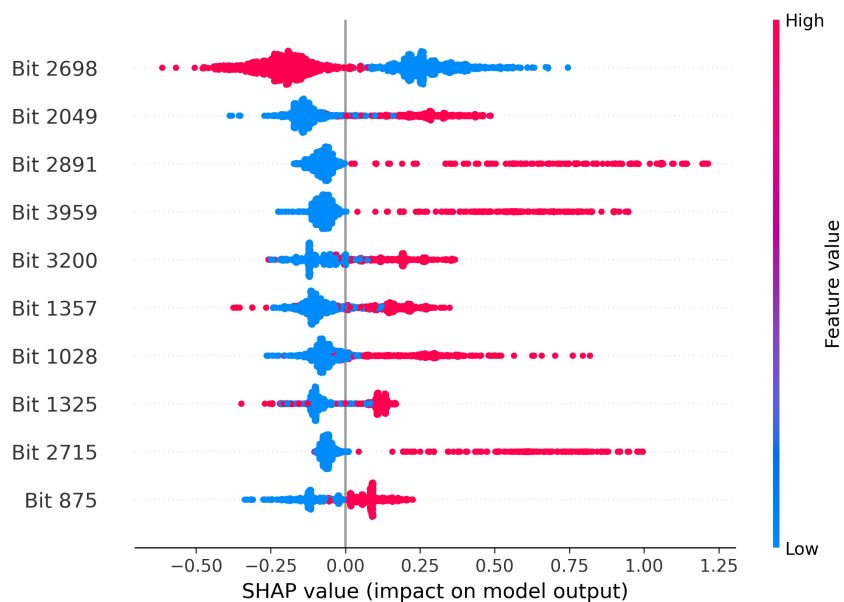

SHAP Summary Plot for the Top 10 Morgan Fingerprint Bits

## X-FP

### Bit Analysis

#### Bit 2698

SHAP Summary Plot for the Bit 2698:

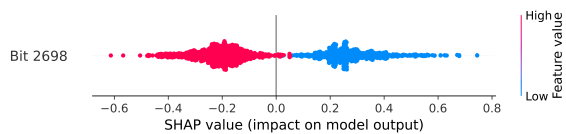

Substructures present:

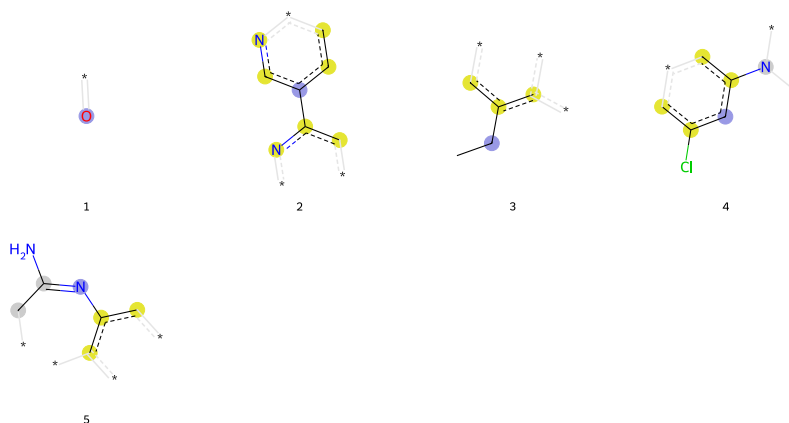

Substructures frequency table (total compounds: 2065):

| Serial | Substructures (as SMARTS)                                      | Total occurrences | Unique occurrences |
|--------|----------------------------------------------------------------|-------------------|--------------------|
| 1      | [O]-*                                                          | 6335              | 1743               |
| 2      | [c;R]1([cH;R];[cH;R]-*-[n;R];[cH;R]:1)-[c;R]([cH;R]-*);[n;R]-* | 6                 | 6                  |
| 3      | [CH2](-[CH3])-[c;R]([cH;R]-*);[c;R](-*)-*                      | 19                | 16                 |
| 4      | [cH;R]1:[c;R]([cH;R]-*-[cH;R];[c;R]:1-[N;R](-*)-*)-[Cl]        | 7                 | 7                  |
| 5      | [N;R](=[C;R](-[NH2])-[CH2;R]-*-[c;R]([cH;R]-*);[c;R](-*)-*     | 1                 | 1                  |



## X-FP

### Bit Analysis

#### Bit 2049

SHAP Summary Plot for the Bit 2049:

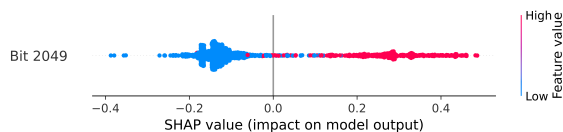

Substructures present:

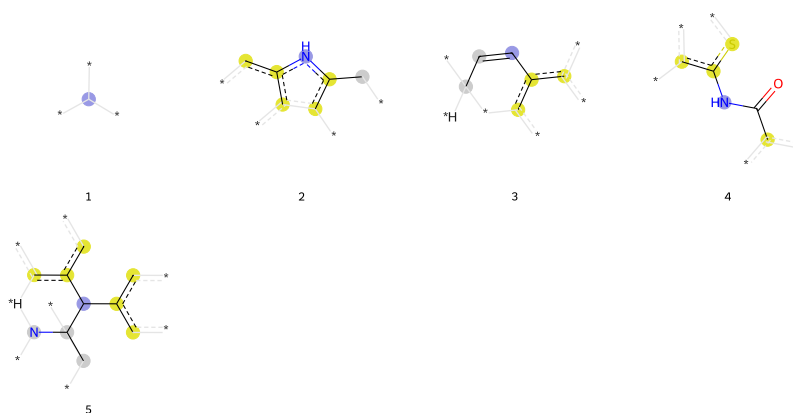

Substructures frequency table (total compounds: 2065):

| Serial | Substructures (as SMARTS)                                                                                           | Total occurrences | Unique occurrences |
|--------|---------------------------------------------------------------------------------------------------------------------|-------------------|--------------------|
| 1      | <chem>[CH](-*)(-*)-*</chem>                                                                                         | 3287              | 1463               |
| 2      | <chem>[nH;R]1-[c;R](:[c;R](:[c;R](:[c;R]1-[cH;R]-*)-*)-*)-[CH2;R]-*</chem>                                          | 41                | 41                 |
| 3      | <chem>[CH;R]1-[c;R](:[c;R](-*)-*)-[C;R](-[CH;R]=1)(-*)-*)-[c;R](-*)-*</chem>                                        | 2                 | 2                  |
| 4      | <chem>[NH](-[C](=[O])-[c;R](-*)-*)-[c;R](:[s;R]-*):[c;R](-*)-*</chem>                                               | 1                 | 1                  |
| 5      | <chem>[CH;R]1(-[CH;R](-[N;R](-*)-*)-[c;R](:[c;R]1-[cH;R]-*)-*)-[CH;R](-*)-*)-[c;R](:[c;R](-*)-*)-[c;R](-*)-*</chem> | 3                 | 3                  |

## X-FP

### Bit Analysis

#### Bit 2891

SHAP Summary Plot for the Bit 2891:

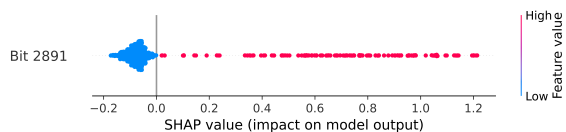

Substructures present:

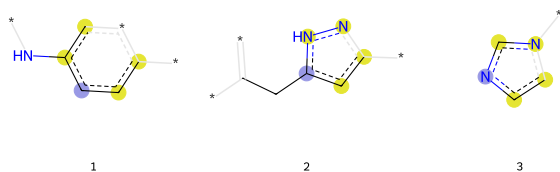

Substructures frequency table (total compounds: 2065):

| Serial | Substructures (as SMARTS)                                             | Total occurrences | Unique occurrences |
|--------|-----------------------------------------------------------------------|-------------------|--------------------|
| 1      | <chem>[cH;R]1:[cH;R]:[c;R](-*)~*-[cH;R]:[c;R]:1-[NH]~*</chem>         | 221               | 170                |
| 2      | <chem>[c;R]1(:[cH;R]:[c;R](:[n;R]:[nH;R]:1)~*)-[CH2]-[C](-*)~*</chem> | 1                 | 1                  |
| 3      | <chem>[n;R]1:[cH;R]:[cH;R]:[n;R](:[cH;R]:1)~*</chem>                  | 12                | 11                 |

## X-FP

### Bit Analysis

#### Bit 3959

SHAP Summary Plot for the Bit 3959:

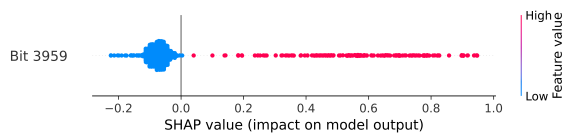

Substructures present:

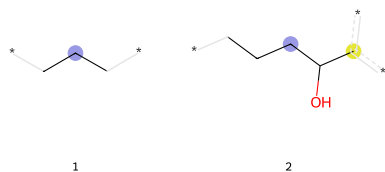

Substructures frequency table (total compounds: 2065):

| Serial | Substructures (as SMARTS)                                  | Total occurrences | Unique occurrences |
|--------|------------------------------------------------------------|-------------------|--------------------|
| 1      | <chem>[CH2](-[CH2]-*)-[CH2]-*</chem>                       | 1251              | 650                |
| 2      | <chem>[CH2](-[CH2]-[CH2]-*)-[CH](-[OH])-[c;R](-*)-*</chem> | 2                 | 2                  |

## X-FP

### Bit Analysis

#### Bit 3200

SHAP Summary Plot for the Bit 3200:

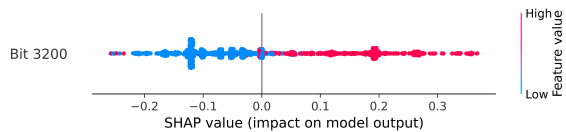

Substructures present:

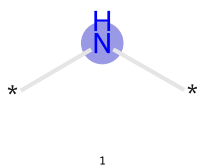

Substructures frequency table (total compounds: 2065):

| Serial | Substructures (as SMARTS) | Total occurrences | Unique occurrences |
|--------|---------------------------|-------------------|--------------------|
| 1      | [NH](-*)-*                | 1334              | 1033               |

## X-FP

### Bit Analysis

#### Bit 1357

SHAP Summary Plot for the Bit 1357:

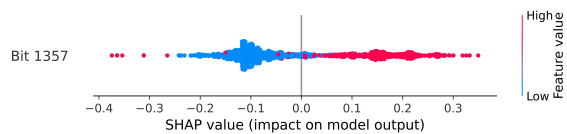

Substructures present:

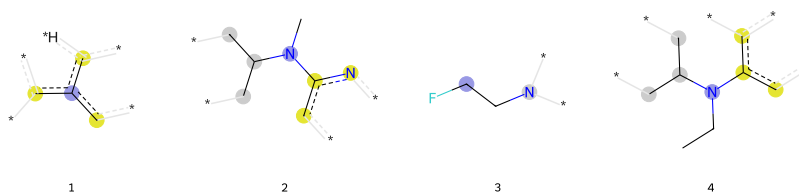

Substructures frequency table (total compounds: 2065):

| Serial | Substructures (as SMARTS)                                                                  | Total occurrences | Unique occurrences |
|--------|--------------------------------------------------------------------------------------------|-------------------|--------------------|
| 1      | <chem>[c;R](:[cH;R]-*)(:[c;R](-*)-*):[c;R](-*)-*</chem>                                    | 729               | 687                |
| 2      | <chem>[N](-[CH3])(-[CH;R](-[CH2;R]-*)-[CH2;R]-*)-[c;R](:[cH;R]-*):[n;R]-*</chem>           | 5                 | 5                  |
| 3      | <chem>[CH2](-[F])-[CH2]-[N;R](-*)-*</chem>                                                 | 1                 | 1                  |
| 4      | <chem>[N](-[CH2]-[CH3])(-[CH;R](-[CH2;R]-*)-[CH2;R]-*)-[c;R](:[cH;R]-*):[c;R](-*)-*</chem> | 2                 | 2                  |

## X-FP

### Bit Analysis

#### Bit 1028

SHAP Summary Plot for the Bit 1028:

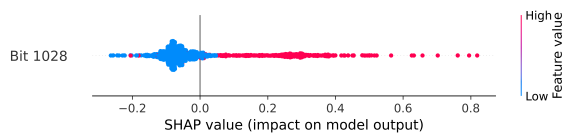

Substructures present:

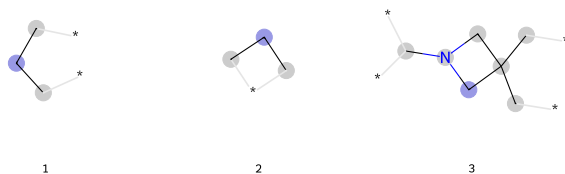

Substructures frequency table (total compounds: 2065):

| Serial | Substructures (as SMARTS)                                                        | Total occurrences | Unique occurrences |
|--------|----------------------------------------------------------------------------------|-------------------|--------------------|
| 1      | <chem>[CH2;R](-[CH2;R]-*)-[CH2;R]-*</chem>                                       | 810               | 474                |
| 2      | <chem>[CH2;R]1-[CH2;R]-*-[CH2;R]-1</chem>                                        | 13                | 13                 |
| 3      | <chem>[CH2;R]1-[N;R](-[CH2;R];[C;R]-1(-[CH2;R]-*)-[CH2;R]-*)-[CH;R](-*)-*</chem> | 1                 | 1                  |

## X-FP

### Bit Analysis

#### Bit 1325

SHAP Summary Plot for the Bit 1325:

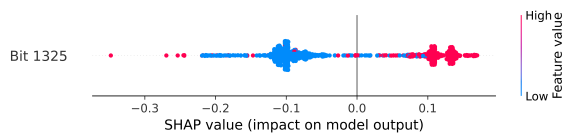

Substructures present:

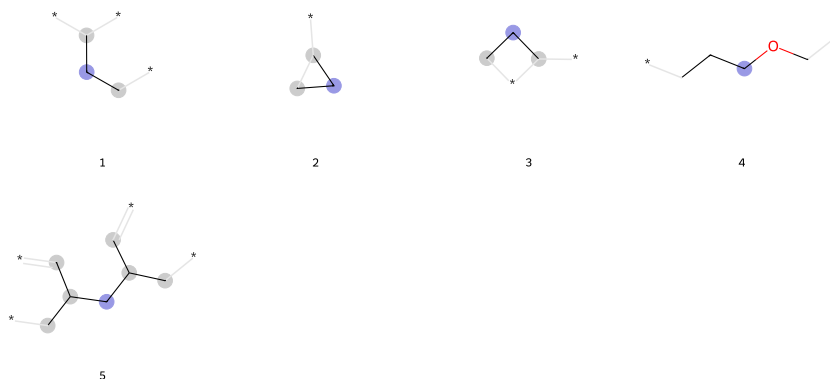

Substructures frequency table (total compounds: 2065):

| Serial | Substructures (as SMARTS)                                                    | Total occurrences | Unique occurrences |
|--------|------------------------------------------------------------------------------|-------------------|--------------------|
| 1      | <chem>[CH2;R](-[CH2;R]-*)-[CH;R](-*)-*</chem>                                | 1093              | 779                |
| 2      | <chem>[CH2;R]1-[CH2;R]-[CH;R]-1-*</chem>                                     | 23                | 22                 |
| 3      | <chem>[CH2;R]1-[CH2;R]-*-[-CH;R]-1-*</chem>                                  | 6                 | 6                  |
| 4      | <chem>[CH2](-[CH2]-[CH2]-*)-[O]-[CH2]-*</chem>                               | 6                 | 3                  |
| 5      | <chem>[CH2](-[CH;R](-[CH2;R]-*)-[CH;R]-*)-[CH;R](-[CH2;R]-*)-[CH;R]-*</chem> | 1                 | 1                  |

## X-FP

### Bit Analysis

#### Bit 2715

SHAP Summary Plot for the Bit 2715:

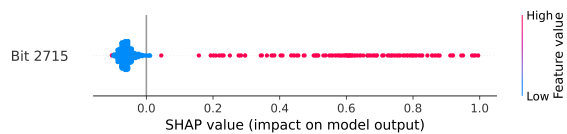

Substructures present:

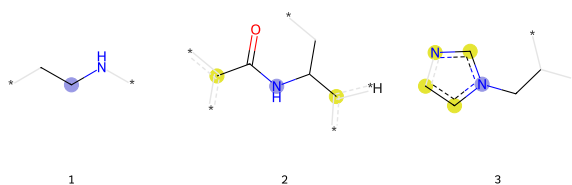

Substructures frequency table (total compounds: 2065):

| Serial | Substructures (as SMARTS)                                            | Total occurrences | Unique occurrences |
|--------|----------------------------------------------------------------------|-------------------|--------------------|
| 1      | <chem>[CH2](-[CH2]-*)-[NH]-*</chem>                                  | 349               | 304                |
| 2      | <chem>[NH](-[CH](-[CH2]-*)-[c;R](-*)-*)-[C](=[O])-[c;R](-*)-*</chem> | 1                 | 1                  |
| 3      | <chem>[n;R]1(:[cH;R];[cH;R];[n;R];[cH;R]:1)-[CH2]-[CH](-*)-*</chem>  | 6                 | 6                  |



## X-FP

### Bit Analysis

#### Bit 875

SHAP Summary Plot for the Bit 875:

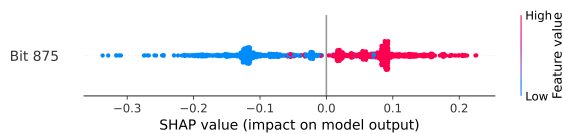

Substructures present:

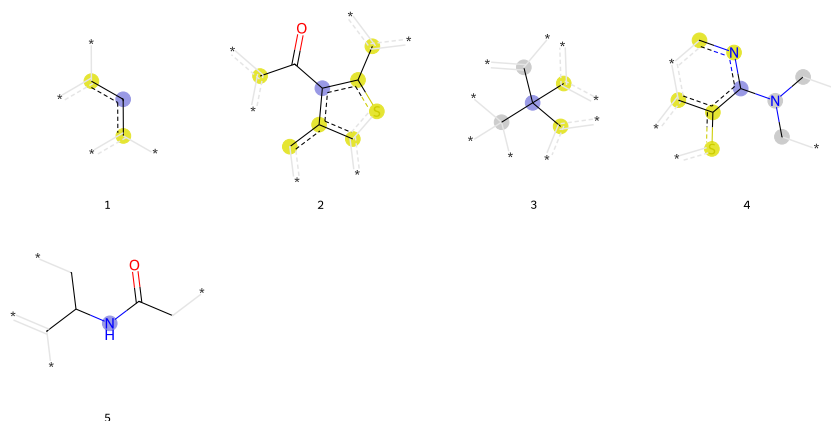

Substructures frequency table (total compounds: 2065):

| Serial | Substructures (as SMARTS)                                                                     | Total occurrences | Unique occurrences |
|--------|-----------------------------------------------------------------------------------------------|-------------------|--------------------|
| 1      | <chem>[cH;R]([c;R](-*)-*)-[c;R](-*)-*</chem>                                                  | 1809              | 1185               |
| 2      | <chem>[c;R]1([c;R]([s;R]:[c;R]([c;R]:1:[cH;R]-*)-*)-[c;R](-*)-*)-[C](=[O])-[c;R](-*)-*</chem> | 1                 | 1                  |
| 3      | <chem>[C;R]([C;R](-*)-*)(-[c;R](-*)-*)-[c;R](-*)-*)-[C;R](-*)-*)-*</chem>                     | 27                | 27                 |
| 4      | <chem>[c;R]1([i;n;R]:[cH;R]-*-[c;R]([c;R]:1:[s;R]-*)-*)-[N;R](-[CH2;R]-*)-[CH2;R]-*</chem>    | 2                 | 2                  |
| 5      | <chem>[NH](-[CH](-[CH2]-*)-[C](-*)-*)-[C](=[O])-[CH2]-*</chem>                                | 12                | 12                 |

## X-FP

### *Bit Analysis*

#### **Notes about substructures rendering:**

- The molecule fragment is drawn with the atoms in the same positions as in the original molecule.
- The central atom is highlighted in blue.
- Aromatic atoms are highlighted in yellow.
- Aliphatic ring atoms are highlighted in dark grey.
- Atoms/bonds that are drawn in light grey indicate pieces of the structure that influence the atoms' connectivity invariants but that are not directly part of the fingerprint.

#### **Notes about feature importance:**

The feature importance here is done by SHAP TreeExplainer. Following are the notes on interpreting the beeswarm SHAP Summary Plots:

- Each dot is the SHAP value of a bit of a molecule (terms used interchangeably are: sample, observation, data point, entry, compound, etc.) in the dataset.
- The dots representing the same SHAP values of a bit overlap. However, the frequency of these values can be observed as the density of the dots along the x-axis.
- Morgan Fingerprint bits are binary in nature. A red dot shows that the bit is switched on for a molecule, meaning that at least one substructure present in this molecule is encoded by this bit. A blue dot means that the bit is switched off for a molecule and this means that no substructures are present in this molecule which are encoded by this bit.
- For binary classification, SHAP values of a Morgan Fingerprint bit greater than zero describe that the presence or absence of this feature contributes towards the model prediction classes' second category (usually labelled as '1'). While the SHAP values less than zero describe that the presence or absence of this feature contributes towards the first category (usually labelled as '0').

#### Caution:

- Bar plots will be used instead of beeswarm plots as a default SHAP Summary Plot in case of multi-class classification. X-FP analysis for multi-class classification is still under testing and should be completely avoided.
- X-FP analysis for regression models is also under testing, and while such models and their SHAP analysis are compatible, they should be also avoided for time-being.

**Figure S6:** Fingerprint model: X-FP report for the Time-Split Set

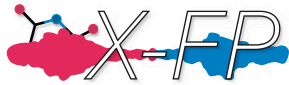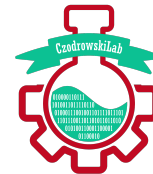

## Time-Split Data: X-FP Report

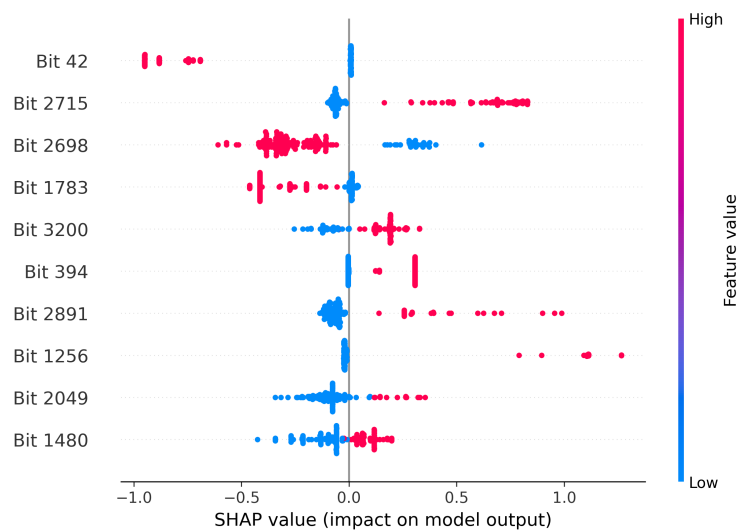

## X-FP

### Bit Analysis

#### Bit 42

SHAP Summary Plot for the Bit 42:

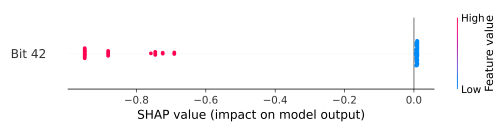

Substructures present:

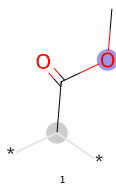

Substructures frequency table (total compounds: 156):

| Serial | Substructures (as SMARTS)          | Total occurrences | Unique occurrences |
|--------|------------------------------------|-------------------|--------------------|
| 1      | [O](-[CH3])-[C](=[O])-[CH;R](-*)~* | 73                | 73                 |

## X-FP

### Bit Analysis

#### Bit 2715

SHAP Summary Plot for the Bit 2715:

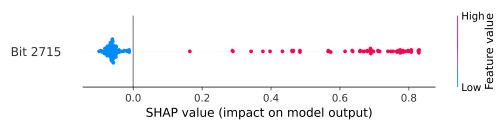

Substructures present:

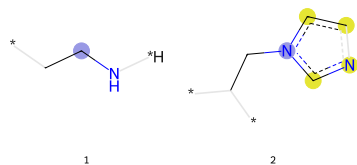

Substructures frequency table (total compounds: 156):

| Serial | Substructures (as SMARTS)                                           | Total occurrences | Unique occurrences |
|--------|---------------------------------------------------------------------|-------------------|--------------------|
| 1      | <chem>[CH2](-[CH2]-*)-[NH]-*</chem>                                 | 84                | 71                 |
| 2      | <chem>[n;R]1(:[cH;R];[cH;R];[n;R];[cH;R];1)-[CH2]-[CH](-*)-*</chem> | 1                 | 1                  |

## X-FP

### Bit Analysis

#### Bit 2698

SHAP Summary Plot for the Bit 2698:

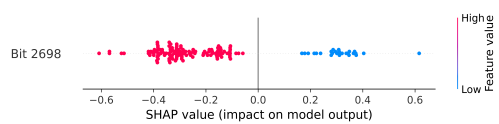

Substructures present:

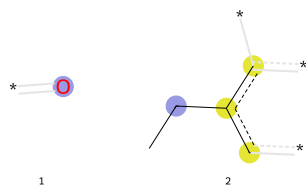

Substructures frequency table (total compounds: 156):

| Serial | Substructures (as SMARTS)                  | Total occurrences | Unique occurrences |
|--------|--------------------------------------------|-------------------|--------------------|
| 1      | [O]-*                                      | 542               | 149                |
| 2      | [CH2](-[CH3])-[c;R](-[cH;R]-*)-[c;R](-*)-* | 1                 | 1                  |

## X-FP

### Bit Analysis

#### Bit 1783

SHAP Summary Plot for the Bit 1783:

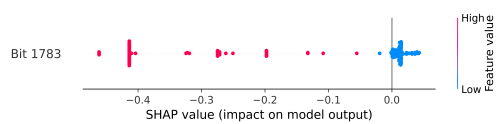

Substructures present:

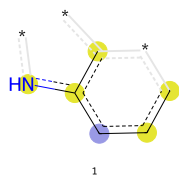

Substructures frequency table (total compounds: 156):

| Serial | Substructures (as SMARTS)                                    | Total occurrences | Unique occurrences |
|--------|--------------------------------------------------------------|-------------------|--------------------|
| 1      | <chem>[cH;R]1:[cH;R]:[cH;R]-*-[c;R]([c;R]:1:[nH;R]-)*</chem> | 76                | 76                 |



## X-FP

### Bit Analysis

#### Bit 3200

SHAP Summary Plot for the Bit 3200:

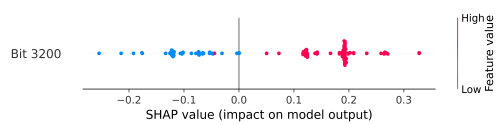

Substructures present:

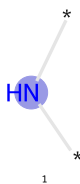

Substructures frequency table (total compounds: 156):

| Serial | Substructures (as SMARTS) | Total occurrences | Unique occurrences |
|--------|---------------------------|-------------------|--------------------|
| 1      | <chem>[NH](-*)-*</chem>   | 174               | 122                |

## X-FP

### Bit Analysis

#### Bit 394

SHAP Summary Plot for the Bit 394:

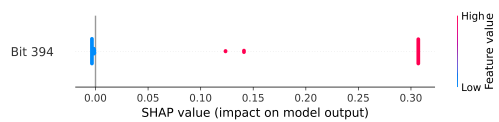

Substructures present:

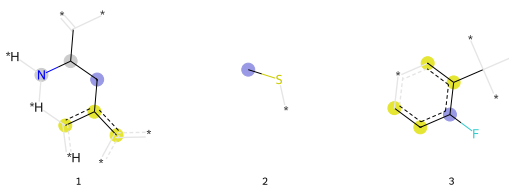

Substructures frequency table (total compounds: 156):

| Serial | Substructures (as SMARTS)                                                           | Total occurrences | Unique occurrences |
|--------|-------------------------------------------------------------------------------------|-------------------|--------------------|
| 1      | <chem>[CH2;R]1-[CH;R](-[N;R])(-[c;R])(-[c;R]1-[c;R](-[R])-[R])-[C](-[R])-[R]</chem> | 73                | 73                 |
| 2      | <chem>[CH3]-[S]-[R]</chem>                                                          | 2                 | 2                  |
| 3      | <chem>[c;R]1(-[cH;R]:[cH;R])-[cH;R]:[c;R]1-[C](-[R])(-[R])-[F]</chem>               | 1                 | 1                  |

## X-FP

### Bit Analysis

#### Bit 2891

SHAP Summary Plot for the Bit 2891:

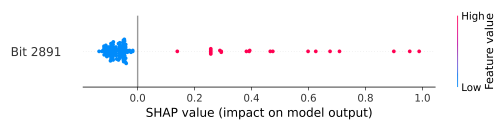

Substructures present:

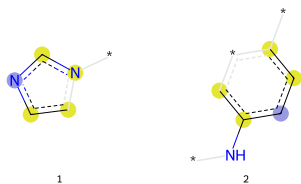

Substructures frequency table (total compounds: 156):

| Serial | Substructures (as SMARTS)                                    | Total occurrences | Unique occurrences |
|--------|--------------------------------------------------------------|-------------------|--------------------|
| 1      | <chem>[n;R]1:[cH;R]:[cH;R];[n;R]([cH;R]:1)-*</chem>          | 11                | 11                 |
| 2      | <chem>[cH;R]1:[cH;R];[c;R](-*)-*[cH;R]:[c;R]:1-[NH]-*</chem> | 12                | 12                 |

## X-FP

### Bit Analysis

#### Bit 1256

SHAP Summary Plot for the Bit 1256:

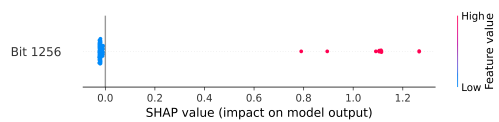

Substructures present:

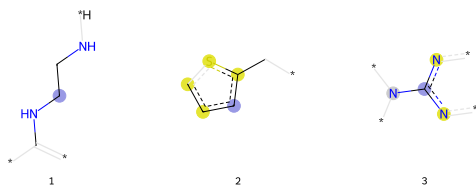

Substructures frequency table (total compounds: 156):

| Serial | Substructures (as SMARTS)                                | Total occurrences | Unique occurrences |
|--------|----------------------------------------------------------|-------------------|--------------------|
| 1      | <chem>[CH2](-[CH2]-[NH]-*)-[NH]-C(-*)-*</chem>           | 20                | 10                 |
| 2      | <chem>[cH;R]1:[cH;R]:[cH;R]:[s;R]:[c;R]:1-[CH2]-*</chem> | 3                 | 3                  |
| 3      | <chem>[c;R](-[n;R]-*)(-[n;R]-*)-[N;R](-*)-*</chem>       | 3                 | 2                  |

## X-FP

### Bit Analysis

#### Bit 2049

SHAP Summary Plot for the Bit 2049:

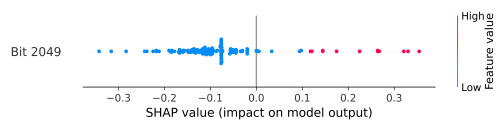

Substructures present:

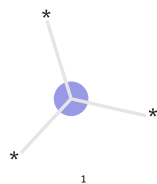

Substructures frequency table (total compounds: 156):

| Serial | Substructures (as SMARTS) | Total occurrences | Unique occurrences |
|--------|---------------------------|-------------------|--------------------|
| 1      | [CH](-)(-)*               | 430               | 127                |

## X-FP

### Bit Analysis

#### Bit 1480

SHAP Summary Plot for the Bit 1480:

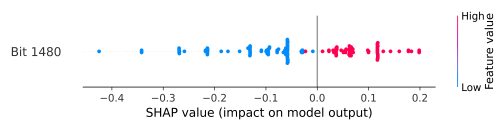

Substructures present:

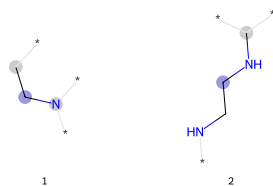

Substructures frequency table (total compounds: 156):

| Serial | Substructures (as SMARTS)                           | Total occurrences | Unique occurrences |
|--------|-----------------------------------------------------|-------------------|--------------------|
| 1      | <chem>[CH2;R](-[CH2;R]-*)-[N;R](-*)-*</chem>        | 134               | 61                 |
| 2      | <chem>[CH2](-[CH2]-[NH]-*)-[NH]-[CH;R](-*)-*</chem> | 10                | 10                 |

## X-FP

### Bit Analysis

#### Notes about substructures rendering:

- The molecule fragment is drawn with the atoms in the same positions as in the original molecule.
- The central atom is highlighted in blue.
- Aromatic atoms are highlighted in yellow.
- Aliphatic ring atoms are highlighted in dark grey.
- Atoms/bonds that are drawn in light grey indicate pieces of the structure that influence the atoms' connectivity invariants but that are not directly part of the fingerprint.

#### Notes about feature importance:

The feature importance here is done by SHAP TreeExplainer. Following are the notes on interpreting the beeswarm SHAP Summary Plots:

- Each dot is the SHAP value of a bit of a molecule (terms used interchangeably are: sample, observation, data point, entry, compound, etc.) in the dataset.
- The dots representing the same SHAP values of a bit overlap. However, the frequency of these values can be observed as the density of the dots along the x-axis.
- Morgan Fingerprint bits are binary in nature. A red dot shows that the bit is switched on for a molecule, meaning that at least one substructure present in this molecule is encoded by this bit. A blue dot means that the bit is switched off for a molecule and this means that no substructures are present in this molecule which are encoded by this bit.
- For binary classification, SHAP values of a Morgan Fingerprint bit greater than zero describe that the presence or absence of this feature contributes towards the model prediction classes' second category (usually labelled as '1'). While the SHAP values less than zero describe that the presence or absence of this feature contributes towards the first category (usually labelled as '0').

#### Caution:

- Bar plots will be used instead of beeswarm plots as a default SHAP Summary Plot in case of multi-class classification. X-FP analysis for multi-class classification is still under testing and should be completely avoided.
- X-FP analysis for regression models is also under testing, and while such models and their SHAP analysis are compatible, they should be also avoided for time-being.

**Figure S7:** Fingerprint model: X-FP report for the External Set



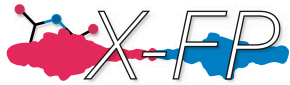

## Purchase Data: X-FP Report

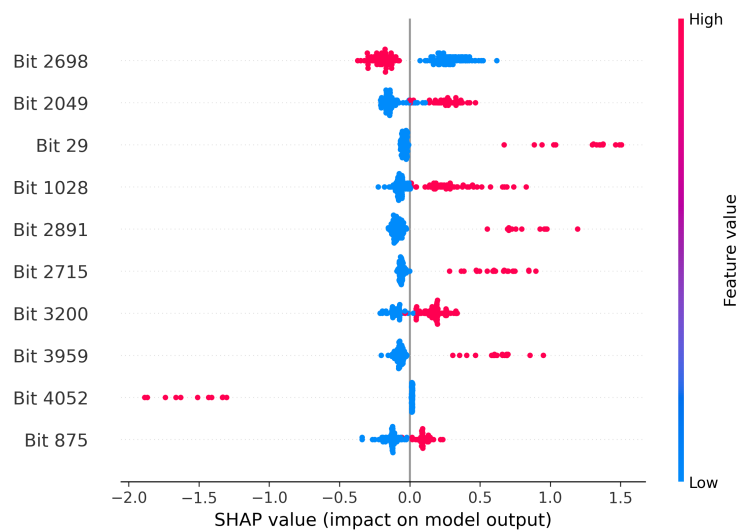

SHAP Summary Plot for the Top 10 Morgan Fingerprint Bits

## X-FP

### Bit Analysis

#### Bit 2698

SHAP Summary Plot for the Bit 2698:

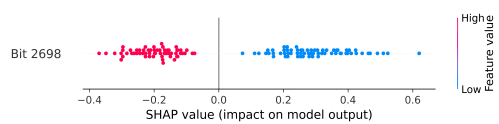

Substructures present:

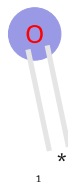

Substructures frequency table (total compounds: 127):

| Serial | Substructures (as SMARTS) | Total occurrences | Unique occurrences |
|--------|---------------------------|-------------------|--------------------|
| 1      | [O]-*                     | 236               | 95                 |

## X-FP

### Bit Analysis

#### Bit 2049

SHAP Summary Plot for the Bit 2049:

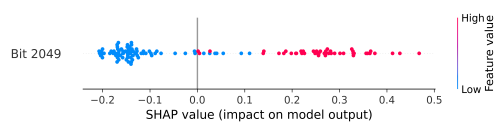

Substructures present:

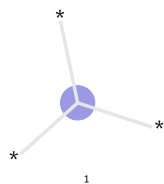

Substructures frequency table (total compounds: 127):

| Serial | Substructures (as SMARTS) | Total occurrences | Unique occurrences |
|--------|---------------------------|-------------------|--------------------|
| 1      | [CH](-)(-)*               | 157               | 87                 |

## X-FP

### Bit Analysis

#### Bit 29

SHAP Summary Plot for the Bit 29:

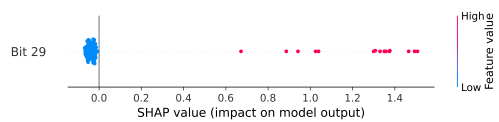

Substructures present:

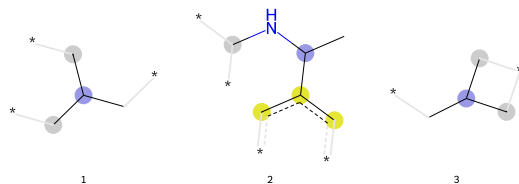

Substructures frequency table (total compounds: 127):

| Serial | Substructures (as SMARTS)                                               | Total occurrences | Unique occurrences |
|--------|-------------------------------------------------------------------------|-------------------|--------------------|
| 1      | <chem>[CH;R](-[CH2;R]-*)(-[CH2;R]-*)-[CH2]-*</chem>                     | 20                | 15                 |
| 2      | <chem>[CH](-[CH3])(-[NH]-[CH;R](-*-)-)-[c;R](-[cH;R]-*)-[cH;R]-*</chem> | 1                 | 1                  |
| 3      | <chem>[CH;R]1(-[CH2;R]-*-)-[CH2;R]-1-[CH2]-*</chem>                     | 1                 | 1                  |

## X-FP

### Bit Analysis

#### Bit 1028

SHAP Summary Plot for the Bit 1028:

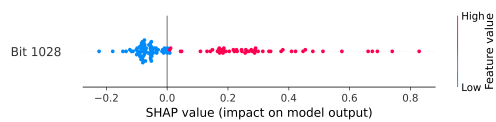

Substructures present:

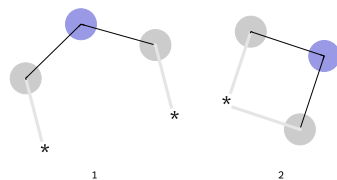

Substructures frequency table (total compounds: 127):

| Serial | Substructures (as SMARTS)                  | Total occurrences | Unique occurrences |
|--------|--------------------------------------------|-------------------|--------------------|
| 1      | <chem>[CH2;R](-[CH2;R]-*)-[CH2;R]-*</chem> | 94                | 53                 |
| 2      | <chem>[CH2;R]1-[CH2;R]-*-[CH2;R]-1</chem>  | 1                 | 1                  |

## X-FP

### Bit Analysis

#### Bit 2891

SHAP Summary Plot for the Bit 2891:

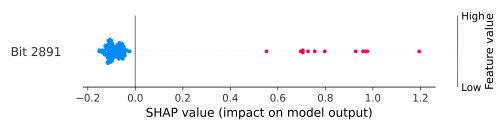

Substructures present:

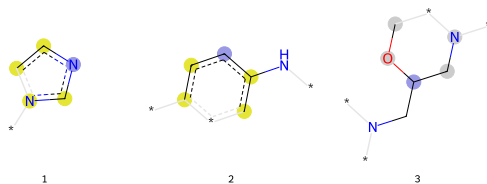

Substructures frequency table (total compounds: 127):

| Serial | Substructures (as SMARTS)                                                  | Total occurrences | Unique occurrences |
|--------|----------------------------------------------------------------------------|-------------------|--------------------|
| 1      | <chem>[n;R]1:[cH;R]:[cH;R]:[n;R]([cH;R]:1)-*</chem>                        | 2                 | 2                  |
| 2      | <chem>[cH;R]1:[cH;R]:[c;R](-*)-*-[cH;R]:[c;R]:1-[NH]-*</chem>              | 10                | 10                 |
| 3      | <chem>[CH;R]1(-[CH2;R]-[N;R](-*)-*-[CH2;R]-[O;R]-1)-[CH2]-[N](-*)-*</chem> | 1                 | 1                  |

## X-FP

### Bit Analysis

#### Bit 2715

SHAP Summary Plot for the Bit 2715:

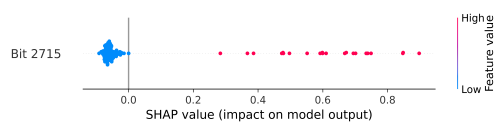

Substructures present:

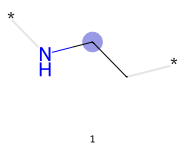

Substructures frequency table (total compounds: 127):

| Serial | Substructures (as SMARTS) | Total occurrences | Unique occurrences |
|--------|---------------------------|-------------------|--------------------|
| 1      | [CH2](-[CH2]-*)-[NH]-*    | 28                | 26                 |

## X-FP

### Bit Analysis

#### Bit 3200

SHAP Summary Plot for the Bit 3200:

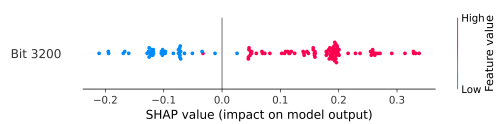

Substructures present:

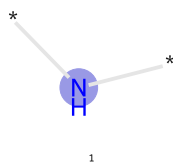

Substructures frequency table (total compounds: 127):

| Serial | Substructures (as SMARTS) | Total occurrences | Unique occurrences |
|--------|---------------------------|-------------------|--------------------|
| 1      | [NH](~)*                  | 108               | 91                 |



## X-FP

### Bit Analysis

#### Bit 3959

SHAP Summary Plot for the Bit 3959:

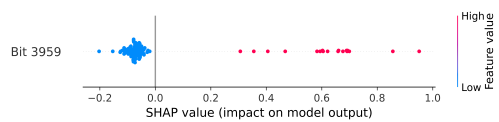

Substructures present:

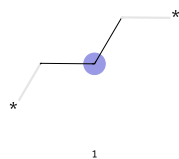

Substructures frequency table (total compounds: 127):

| Serial | Substructures (as SMARTS) | Total occurrences | Unique occurrences |
|--------|---------------------------|-------------------|--------------------|
| 1      | [CH2](-[CH2]-*)-[CH2]-*   | 115               | 64                 |

## X-FP

### Bit Analysis

#### Bit 4052

SHAP Summary Plot for the Bit 4052:

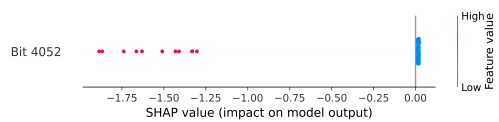

Substructures present:

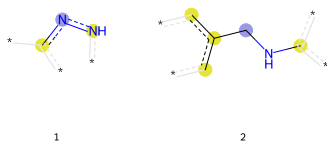

Substructures frequency table (total compounds: 127):

| Serial | Substructures (as SMARTS)                                    | Total occurrences | Unique occurrences |
|--------|--------------------------------------------------------------|-------------------|--------------------|
| 1      | <chem>[n;R]([nH;R]-*):[c;R](-)*</chem>                       | 9                 | 9                  |
| 2      | <chem>[CH2](-[NH]-[c;R](-)*):[c;R]([cH;R]-*):[cH;R]-*</chem> | 2                 | 2                  |

## X-FP

### Bit Analysis

#### Bit 875

SHAP Summary Plot for the Bit 875:

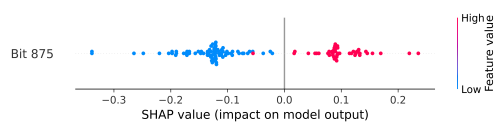

Substructures present:

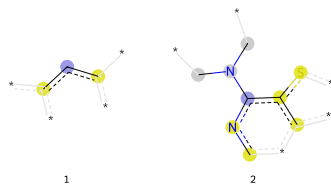

Substructures frequency table (total compounds: 127):

| Serial | Substructures (as SMARTS)                                                            | Total occurrences | Unique occurrences |
|--------|--------------------------------------------------------------------------------------|-------------------|--------------------|
| 1      | <chem>[cH;R]([c;R](-)-);[c;R](-)-*</chem>                                            | 56                | 46                 |
| 2      | <chem>[c;R]1([n;R];[cH;R]-*-[c;R]([c;R]:1[s;R]-*)-[N;R](-[CH2;R]-*)-[CH2;R]-*</chem> | 1                 | 1                  |

## X-FP

### Bit Analysis

#### Notes about substructures rendering:

- The molecule fragment is drawn with the atoms in the same positions as in the original molecule.
- The central atom is highlighted in blue.
- Aromatic atoms are highlighted in yellow.
- Aliphatic ring atoms are highlighted in dark grey.
- Atoms/bonds that are drawn in light grey indicate pieces of the structure that influence the atoms' connectivity invariants but that are not directly part of the fingerprint.

#### Notes about feature importance:

The feature importance here is done by SHAP TreeExplainer. Following are the notes on interpreting the beeswarm SHAP Summary Plots:

- Each dot is the SHAP value of a bit of a molecule (terms used interchangeably are: sample, observation, data point, entry, compound, etc.) in the dataset.
- The dots representing the same SHAP values of a bit overlap. However, the frequency of these values can be observed as the density of the dots along the x-axis.
- Morgan Fingerprint bits are binary in nature. A red dot shows that the bit is switched on for a molecule, meaning that at least one substructure present in this molecule is encoded by this bit. A blue dot means that the bit is switched off for a molecule and this means that no substructures are present in this molecule which are encoded by this bit.
- For binary classification, SHAP values of a Morgan Fingerprint bit greater than zero describe that the presence or absence of this feature contributes towards the model prediction classes' second category (usually labelled as '1'). While the SHAP values less than zero describe that the presence or absence of this feature contributes towards the first category (usually labelled as '0').

#### Caution:

- Bar plots will be used instead of beeswarm plots as a default SHAP Summary Plot in case of multi-class classification. X-FP analysis for multi-class classification is still under testing and should be completely avoided.
- X-FP analysis for regression models is also under testing, and while such models and their SHAP analysis are compatible, they should be also avoided for time-being.

**Table S1:** List of selected intuitive RDKit descriptors (version 2022.09.05)

|    |                          |
|----|--------------------------|
| 1  | NumValenceElectrons      |
| 2  | NumRadicalElectrons      |
| 3  | NumAliphaticCarbocycles  |
| 4  | NumAliphaticHeterocycles |
| 5  | NumAliphaticRings        |
| 6  | NumAromaticCarbocycles   |
| 7  | NumAromaticHeterocycles  |
| 8  | NumAromaticRings         |
| 9  | NumHAcceptors            |
| 10 | NumHDonors               |
| 11 | NumHeteroatoms           |
| 12 | NumRotatableBonds        |
| 13 | NumSaturatedCarbocycles  |
| 14 | NumSaturatedHeterocycles |
| 15 | NumSaturatedRings        |
| 16 | HeavyAtomMolWt           |
| 17 | TPSA                     |
| 18 | FractionCSP3             |
| 19 | HeavyAtomCount           |
| 20 | NHOHCount                |
| 21 | NOCCount                 |
| 22 | RingCount                |
| 23 | fr_Al_COO                |
| 24 | fr_Al_OH                 |
| 25 | fr_Al_OH_noTert          |
| 26 | fr_ArN                   |
| 27 | fr_Ar_COO                |
| 28 | fr_Ar_N                  |
| 29 | fr_Ar_NH                 |
| 30 | fr_Ar_OH                 |
| 31 | fr_COO                   |
| 32 | fr_COO2                  |
| 33 | fr_C_O                   |
| 34 | fr_C_O_noCOO             |
| 35 | fr_C_S                   |
| 36 | fr_HOCCN                 |
| 37 | fr_Imine                 |
| 38 | fr_NH0                   |
| 39 | fr_NH1                   |
| 40 | fr_NH2                   |
| 41 | fr_N_O                   |
| 42 | fr_Ndealkylation1        |
| 43 | fr_Ndealkylation2        |
| 44 | fr_Nhpyrrole             |
| 45 | fr_SH                    |
| 46 | fr_aldehyde              |
| 47 | fr_alkyl_carbamate       |
| 48 | fr_alkyl_halide          |
| 49 | fr_allylic_oxid          |
| 50 | fr_amide                 |
| 51 | fr_amidine               |
| 52 | fr_aniline               |
| 53 | fr_aryl_methyl           |
| 54 | fr_azide                 |
| 55 | fr_azo                   |
| 56 | fr_barbitur              |

57 fr\_benzene  
58 fr\_benzodiazepine  
59 fr\_bicyclic  
60 fr\_diazo  
61 fr\_dihydropyridine  
62 fr\_epoxide  
63 fr\_ester  
64 fr\_ether  
65 fr\_furan  
66 fr\_guanido  
67 fr\_halogen  
68 fr\_hdrzine  
69 fr\_hdrzone  
70 fr\_imidazole  
71 fr\_imide  
72 fr\_isocyan  
73 fr\_isothiocyan  
74 fr\_ketone  
75 fr\_ketone\_Topliss  
76 fr\_lactam  
77 fr\_lactone  
78 fr\_methoxy  
79 fr\_morpholine  
80 fr\_nitrile  
81 fr\_nitro  
82 fr\_nitro\_arom  
83 fr\_nitro\_arom\_nonortho  
84 fr\_nitroso  
85 fr\_oxazole  
86 fr\_oxime  
87 fr\_para\_hydroxylation  
88 fr\_phenol  
89 fr\_phenol\_noOrthoHbond  
90 fr\_phos\_acid  
91 fr\_phos\_ester  
92 fr\_piperdine  
93 fr\_piperzine  
94 fr\_priamide  
95 fr\_prisulfonamd  
96 fr\_pyridine  
97 fr\_quatN  
98 fr\_sulfide  
99 fr\_sulfonamd  
100 fr\_sulfone  
101 fr\_term\_acetylene  
102 fr\_tetrazole  
103 fr\_thiazole  
104 fr\_thiocyan  
105 fr\_thiophene  
106 fr\_unbrch\_alkane  
107 fr\_urea
